# Supplementary material for: Lesion-symptom mapping with NIHSS sub-scores in ischemic stroke patients
Source: HighWire-hosted journal article supplement (doi:10.1136/svn-2021-001091), 2021-11-25
Supplement: svn-2021-001091supp001_data_supplement.pdf [file svn-2021-001091supp001_data_supplement.pdf]

**Appendix:***Table S1: Patient characteristics of the 180 subjects in this study.*

| <b>Characteristics</b> | <b>MRI (N=54)</b> | <b>CT (N=126)</b> |
|------------------------|-------------------|-------------------|
| <b>Age</b>             | 67.6 ± 14.6       | 69.7 ± 12.6       |
| <b>Sex</b>             | 22 females        | 56 females        |
| <b>Treatment</b>       | 17 control        | 72 control        |
| <b>Follow-up time</b>  | 38.5 ± 28.7       | 26.9 ± 15.5       |
| <b>Baseline NIHSS</b>  | 15                | 16                |
| <b>48-hour NIHSS</b>   | 3                 | 11                |

Table S2: Summary of critical regions across all six categories in score-based grouping. The average score per region is calculated using only the non-zero voxels.

| Region                              | Consciousness | Language    | Motor       | Sensory     | Neglect     | Vision      | Total       |
|-------------------------------------|---------------|-------------|-------------|-------------|-------------|-------------|-------------|
| <b>Left hemisphere</b>              |               |             |             |             |             |             |             |
| Anterior segment of arcuate         | 0.36 ± 0.20   | 0.35 ± 0.20 | X           | X           | X           | 0.28 ± 0.14 | 0.37 ± 0.21 |
| Arcuate fasciculus                  | 0.26 ± 0.16   | 0.34 ± 0.21 | 0.22 ± 0.10 | 0.16 ± 0.04 | X           | 0.25 ± 0.12 | 0.03 ± 0.17 |
| Corpus callosum                     | 0.35 ± 0.17   | X           | X           | X           | X           | X           | X           |
| Corticoponto cerebellum             | 0.39 ± 0.21   | X           | X           | X           | X           | X           | 0.32 ± 0.16 |
| Corticospinal tract                 | 0.28 ± 0.18   | 0.27 ± 0.13 | 0.21 ± 0.09 | X           | X           | X           | X           |
| Heschl's gyrus                      | 0.38 ± 0.21   | 0.36 ± 0.17 | X           | X           | X           | X           | X           |
| Inferior Occipitofrontal fasciculus | 0.27 ± 0.15   | X           | X           | X           | X           | X           | X           |
| Long segment of arcuate             | X             | X           | X           | X           | X           | X           | 0.32 ± 0.15 |
| Postcentral                         | X             | X           | X           | X           | X           | X           | 0.34 ± 0.18 |
| Posterior segment                   | 0.28 ± 0.14   | X           | X           | X           | X           | X           | X           |
| Rolandic operculum                  | 0.40 ± 0.23   | 0.40 ± 0.22 | X           | X           | X           | X           | X           |
| Insula                              | X             | 0.26 ± 0.13 | X           | X           | X           | X           | X           |
| <b>Right hemisphere</b>             |               |             |             |             |             |             |             |
| Anterior segment of arcuate         | X             | X           | X           | X           | 0.33 ± 0.17 | 0.40 ± 0.24 | 0.19 ± 0.60 |
| Arcuate fasciculus                  | X             | X           | 0.30 ± 0.15 | 0.27 ± 0.15 | 0.27 ± 0.15 | X           | X           |
| Corticoponto cerebellum             | X             | X           | X           | 0.35 ± 0.23 | 0.31 ± 0.15 | X           | X           |
| Corticospinal                       | X             | X           | 0.35 ± 0.22 | 0.45 ± 0.25 | 0.27 ± 0.13 | X           | 0.18 ± 0.06 |
| Frontal inferior operculum          | X             | X           | X           | X           | X           | 0.27 ± 0.13 | X           |
| Insula                              | X             | X           | X           | X           | 0.21 ± 0.09 | X           | X           |

|                                     |   |   |             |             |             |             |   |
|-------------------------------------|---|---|-------------|-------------|-------------|-------------|---|
| <b>Internal capsule</b>             | X | X | 0.37 ± 0.20 | X           | X           | 0.28 ± 0.14 | X |
| <b>Long segment of arcuate</b>      | X | X | 0.34 ± 0.19 | X           | 0.27 ± 0.16 | 0.30 ± 0.14 | X |
| <b>Posterior segment of arcuate</b> | X | X | X           | 0.29 ± 0.16 | X           | X           | X |
| <b>Rolandic operculum</b>           | X | X | X           | 0.18 ± 0.06 | X           | X           | X |
| <b>Temporal superior</b>            | X | X | X           | 0.25 ± 0.13 | X           | 0.30 ± 0.19 | X |

Table S3: Summary of critical regions across all six categories in anatomy-based grouping. The average score per region is calculated only using the non-zero voxels.

| Region                           | Consciousness | Language    | Motor       | Sensory     | Ataxia      | Vision      | Total       |
|----------------------------------|---------------|-------------|-------------|-------------|-------------|-------------|-------------|
| <b>Left hemisphere</b>           |               |             |             |             |             |             |             |
| Anterior segment of arcuate      | X             | X           | X           | X           | X           | X           | 0.37 ± 0.21 |
| Arcuate fasciculus               | X             | X           | 0.21 ± 0.09 | 0.19 ± 0.08 | X           | 0.27 ± 0.14 | 0.03 ± 0.17 |
| Corpus callosum                  | X             | 0.29 ± 0.09 | X           | X           | X           | X           | X           |
| Corticoponto cerebellum          | X             | X           | 0.23 ± 0.11 | X           | X           | X           | 0.32 ± 0.16 |
| Corticospinal tract              | 0.13 ± 0.03   | 0.20 ± 0.09 | 0.22 ± 0.09 | X           | 0.22 ± 0.11 | 0.23 ± 0.13 | X           |
| Heschl's gyrus                   | X             | 0.35 ± 0.16 | X           | X           | X           | X           | X           |
| Long segment of arcuate          | X             | X           | X           | X           | X           | X           | 0.32 ± 0.15 |
| Postcentral gyrus                | X             | X           | X           | X           | X           | X           | 0.34 ± 0.18 |
| Rolandic operculum               | X             | 0.36 ± 0.19 | X           | X           | X           | X           | X           |
| Insula                           | X             | 0.32 ± 0.19 | X           | X           | X           | X           | X           |
| <b>Right hemisphere</b>          |               |             |             |             |             |             |             |
| Anterior segment of arcuate      | X             | X           | 0.34 ± 0.04 | X           | X           | X           | 0.19 ± 0.60 |
| Anterior commissure              | X             | X           | X           | X           | 0.38 ± 0.22 | X           | X           |
| Arcuate fasciculus               | 0.34 ± 0.21   | X           | 0.23 ± 0.10 | X           | 0.16 ± 0.05 | X           | X           |
| Caudate                          | X             | X           | X           | 0.22 ± 0.10 | X           | X           | X           |
| Corticospinal tract              | 0.27 ± 0.16   | X           | 0.33 ± 0.19 | 0.28 ± 0.18 | X           | X           | 0.18 ± 0.06 |
| Corticoponto cerebellum          | 0.20 ± 0.07   | X           | 0.33 ± 0.18 | 0.34 ± 0.21 | X           | X           | X           |
| Inferior longitudinal fasciculus | X             | X           | X           | X           | 0.38 ± 0.23 | X           | X           |
| Internal capsule                 | 0.18 ± 0.06   | X           | X           | 0.32 ± 0.18 | X           | X           | X           |
| Long segment of arcuate          | 0.43 ± 0.23   | X           | X           | X           | X           | X           | X           |

|                            |             |   |   |   |             |             |   |
|----------------------------|-------------|---|---|---|-------------|-------------|---|
| <b>Pallidum</b>            | X           | X | X | X | 0.24 ± 0.12 | X           | X |
| <b>Supramarginal gyrus</b> | X           | X | X | X | 0.20 ± 0.08 | X           | X |
| <b>Rolandic operculum</b>  | 0.22 ± 0.09 | X | X | X | X           | 0.36 ± 0.21 | X |
| <b>Temporal superior</b>   | X           | X | X | X | X           | 0.38 ± 0.23 | X |
